# Supplementary material
Source: PubMed Central journal article supplement (PMC8730362)

Liver

Lung

Spleen

Empty Capsules

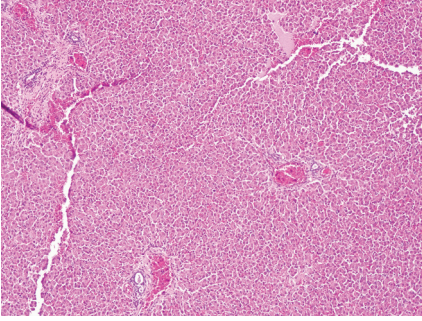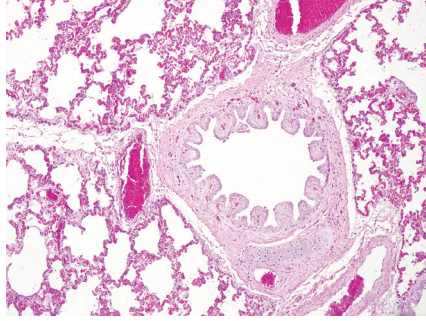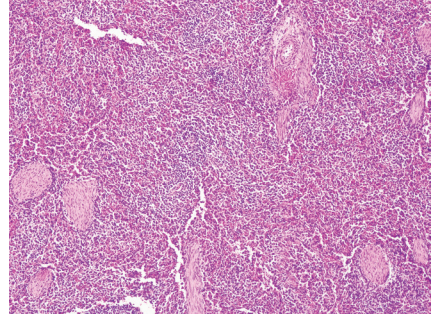

Rev. 1

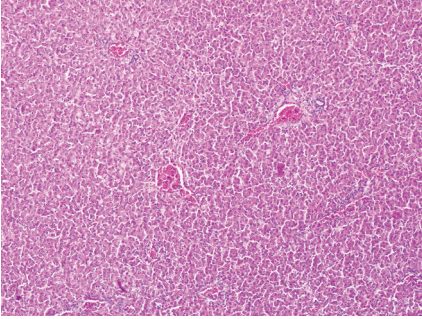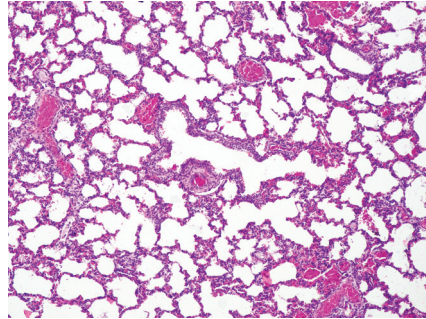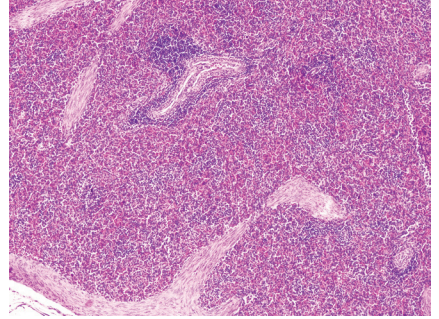

16M delta vjbR  
encapsulated

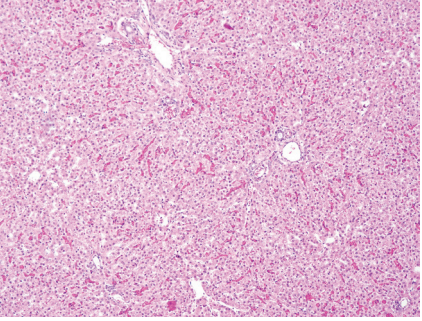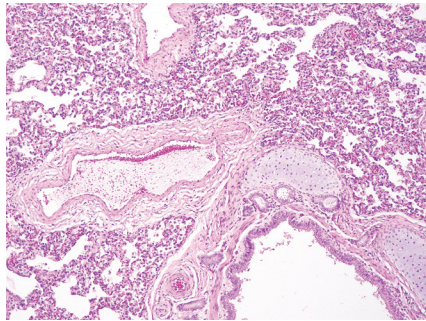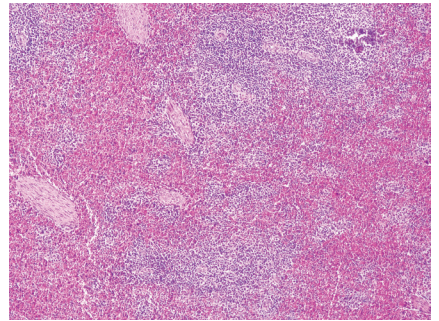

16M delta vjbR  
unencapsulated

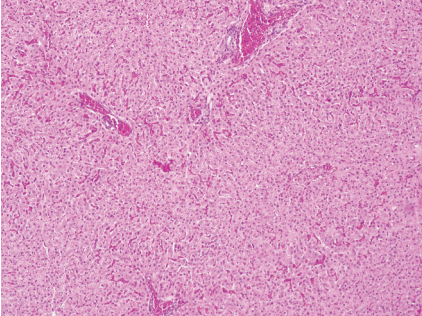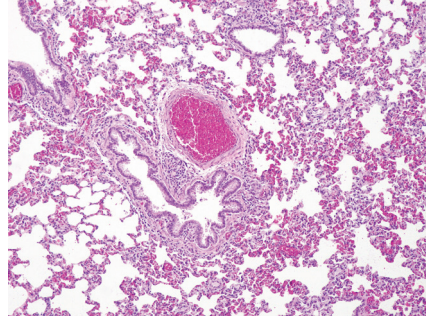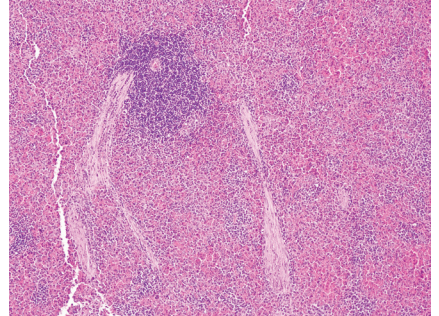

Supplement: NIHMS1654865-supplement-Figure_S5.pdf [file NIHMS1654865-supplement-Figure_S5.pdf]
